# Supplementary material
Source: ML conference proceedings conference paper supplement (https://proceedings.mlr.press/v139/feng21a.html)
Supplement: Supplementary file [file feng21a-supp.pdf]

## A. Missing proofs from Section 3

**Theorem A.1** (A version of Lemma 14 of (Sohler and Woodruff, 2018)). *Let  $P$  be an  $r$  dimensional subspace of  $\mathbb{R}^d$  such that*

$$\sum_i \text{dist}(a_i, P) - \sum_i \text{dist}(a_i, \text{span}(P \cup H)) \leq \frac{\varepsilon^2}{80} \text{SubApx}_{k,1}(A)$$

for all  $k$ -dimensional subspaces  $H$ . Let  $B \in \mathbb{R}^{d \times r}$  be an orthonormal basis for the subspace  $P$ . For each  $a_i$ , let  $a_i^B \in \mathbb{R}^r$  be such that  $\text{dist}(a_i, Ba_i^B) \leq (1 + \varepsilon_c)\text{dist}(a_i, P)$  and let  $(1 - \varepsilon_c)\text{dist}(a_i, P) \leq \text{apx}_i \leq (1 + \varepsilon_c)\text{dist}(a_i, P)$  for  $\varepsilon_c = \varepsilon^2/6$ . Then for any  $k$  dimensional shape  $S$ ,

$$\sum_i \sqrt{\text{dist}(Ba_i^B, S)^2 + \text{apx}_i^2} = (1 \pm 5\varepsilon) \sum_i \text{dist}(a_i, S)$$

*Proof.* We have by the Pythagorean theorem that  $\text{dist}(Ba_i^B, a_i)^2 = \text{dist}(Ba_i^B, \mathbb{P}_P a_i)^2 + \text{dist}(a_i, P)^2 \leq (1 + 3\varepsilon_c)\text{dist}(a_i, P)^2$  which implies that  $\text{dist}(Ba_i^B, \mathbb{P}_P a_i)^2 \leq (3\varepsilon_c)\text{dist}(a_i, P)^2$ .

Given a shape  $S$ , we partition  $[n]$  into two sets *small* and *large*. We say  $i \in [n]$  is *small* if  $\text{dist}(\mathbb{P}_P a_i, S) \leq \text{dist}(\mathbb{P}_P a_i, Ba_i^B)$ . In that case,  $\text{dist}(Ba_i^B, S)^2 \leq 4\text{dist}(\mathbb{P}_P a_i, Ba_i^B)^2 \leq 12\varepsilon_c \text{dist}(a_i, P)^2$  by the triangle inequality and  $\sqrt{\text{dist}(Ba_i^B, S)^2 + \text{apx}_i^2} \leq \sqrt{1 + 15\varepsilon_c} \text{dist}(a_i, P) \leq \sqrt{1 + 15\varepsilon_c} \sqrt{\text{dist}(a_i, P)^2 + \text{dist}(\mathbb{P}_P a_i, S)^2}$ . Similarly,  $\sqrt{\text{dist}(Ba_i^B, S)^2 + \text{apx}_i^2} \geq \text{apx}_i \geq (1 - \varepsilon_c)\text{dist}(a_i, P) \geq (1 - 4\varepsilon_c) \sqrt{\text{dist}(\mathbb{P}_P a_i, S)^2 + \text{dist}(a_i, P)^2}$  by using the fact that  $\text{dist}(\mathbb{P}_P a_i, S)^2 \leq 3\varepsilon_c \text{dist}(a_i, P)^2$ .

We say that any  $i \in [n]$  that is not *small*, is *large*. By the triangle inequality, we obtain that

$$\text{dist}(\mathbb{P}_P a_i, S) - \text{dist}(\mathbb{P}_P a_i, Ba_i^B) \leq \text{dist}(Ba_i^B, S) \leq \text{dist}(\mathbb{P}_P a_i, S) + \text{dist}(Ba_i^B, \mathbb{P}_P a_i). \quad (2)$$

As  $i$  is *large*,  $\text{dist}(\mathbb{P}_P a_i, S) - \text{dist}(\mathbb{P}_P a_i, Ba_i^B) > 0$  and therefore by the AM-GM inequality, we obtain that

$$\text{dist}(Ba_i^B, S)^2 = (1 \pm \varepsilon)\text{dist}(\mathbb{P}_P a_i, S)^2 + \left(1 \pm \frac{1}{\varepsilon}\right) \text{dist}(Ba_i^B, \mathbb{P}_P a_i)^2.$$

Thus,  $\text{dist}(Ba_i^B, S)^2 \leq (1 + \varepsilon)\text{dist}(\mathbb{P}_P a_i, S)^2 + (2/\varepsilon)(3\varepsilon_c)\text{dist}(a_i, P)^2$  and  $\text{dist}(Ba_i^B, S)^2 \geq (1 - \varepsilon)\text{dist}(\mathbb{P}_P a_i, S)^2 - (1/\varepsilon)(3\varepsilon_c)\text{dist}(a_i, P)^2$ . Letting  $\varepsilon_c = \varepsilon^2/6$ , we finally have

$$\text{dist}(Ba_i^B, S)^2 + \text{apx}_i^2 \leq (1 + \varepsilon)\text{dist}(\mathbb{P}_P a_i, S)^2 + (1 + 2\varepsilon)\text{dist}(a_i, P)^2$$

and

$$\text{dist}(Ba_i^B, S)^2 + \text{apx}_i^2 \geq (1 - \varepsilon)\text{dist}(\mathbb{P}_P a_i, S)^2 + (1 - 3\varepsilon)\text{dist}(a_i, P)^2.$$

Therefore, by combining both *small* and *large* indices,

$$\sum_i \sqrt{\text{dist}(Ba_i^B, S)^2 + \text{apx}_i^2} \leq \sqrt{1 + O(\varepsilon)} \sum_i \sqrt{\text{dist}(\mathbb{P}_P a_i, S)^2 + \text{dist}(a_i, P)^2}$$

and

$$\sum_i \sqrt{\text{dist}(Ba_i^B, S)^2 + \text{apx}_i^2} \geq \sqrt{1 - O(\varepsilon)} \sum_i \sqrt{\text{dist}(\mathbb{P}_P a_i, S)^2 + \text{dist}(a_i, P)^2}.$$

The theorem now follows from Theorem 8 of (Sohler and Woodruff, 2018).  $\square$

## B. Missing Proofs from Section 4

### B.1. Lopsided Embeddings and Gaussian Matrices

Recall  $\|\cdot\|_h$  is defined as  $\|A\|_h = \sum_j \|A_{*j}\|_2$ . Note that  $\|A\|_h = \|A^T\|_{1,2}$  for all matrices  $A$ . The following lemma shows that lopsided- $\varepsilon$  embeddings for certain matrices w.r.t. the norm  $\|\cdot\|_h$  imply a dimension reduction for  $\|\cdot\|_{1,2}$  subspace approximation.

**Lemma B.1.** *Given a matrix  $A \in \mathbb{R}^{n \times d}$  and a parameter  $k \in \mathbb{Z}_{>0}$ , let  $U_k \in \mathbb{R}^{n \times k}$  and  $V_k^\top \in \mathbb{R}^{k \times d}$  be matrices such that*

$$\|U_k V_k^\top - A\|_{1,2} = \min_{\text{rank-}k \ X} \|A(I - X)\|_{1,2}.$$

*If  $S$  is a lopsided  $\varepsilon$ -embedding for  $(V_k, A^\top)$  with respect to the norm  $\|\cdot\|_h$ , then*

$$\min_{\text{rank-}k \ X} \|AS^\top X - A\|_{1,2} \leq (1 + O(\varepsilon)) \min_{\text{rank-}k \ X} \|A(I - X)\|_{1,2}.$$

*Proof.* Note that  $\|V_k U_k^\top - A^\top\|_h = \min_Y \|V_k Y^\top - A^\top\|_h$ . By definition of a lopsided embedding, we have the following for any matrix  $Y$ :

$$\|Y V_k^\top S^\top - AS^\top\|_{1,2} = \|S V_k Y^\top - SA^\top\|_h \geq (1 - \varepsilon) \|V_k Y^\top - A^\top\|_h = (1 - \varepsilon) \|Y V_k^\top - A\|_{1,2}$$

and also that

$$\|U_k V_k^\top S^\top - AS^\top\|_{1,2} = \|S V_k U_k^\top - SA^\top\|_h \leq (1 + \varepsilon) \|V_k U_k^\top - A^\top\|_h = (1 + \varepsilon) \|U_k V_k^\top - A\|_{1,2}.$$

Using these guarantees we now show that the column span of the matrix  $AS^\top$  contains a good solution to the subspace approximation problem. First consider the minimization problem

$$\min_Y \|Y V_k^\top - A\|_{1,2}.$$

Clearly,  $U_k$  is the optimal solution to the problem. Now consider the optimal solution  $\tilde{Y}$  to the sketched version of the above problem

$$\tilde{Y} = \arg \min_Y \|Y V_k^\top S^\top - AS^\top\|_{1,2}.$$

We can see that  $\tilde{Y} = (AS^\top)(V_k^\top S^\top)^+$ . Now

$$\|\tilde{Y} V_k^\top - A\|_{1,2} \leq \frac{1}{1 - \varepsilon} \|\tilde{Y} V_k^\top S^\top - AS^\top\|_{1,2} \leq \frac{1}{1 - \varepsilon} \|U_k V_k^\top S^\top - AS^\top\|_{1,2} \leq \frac{1 + \varepsilon}{1 - \varepsilon} \|U_k V_k^\top - A\|_{1,2}.$$

Therefore,

$$\min_{\text{rank-}k \ X} \|AS^\top X - A\|_{1,2} \leq \|AS^\top (V_k^\top S^\top)^+ (V_k^\top) - A\|_{1,2} \leq \frac{1 + \varepsilon}{1 - \varepsilon} \|U_k V_k^\top - A\|_{1,2} \leq (1 + 3\varepsilon) \min_{\text{rank-}k \ X} \|A(I - X)\|_{1,2}.$$

Thus, if the number of rows of  $S$  is less than  $d$ , we obtain a dimension reduction for  $\|\cdot\|_{1,2}$  subspace approximation.  $\square$

Clarkson and Woodruff (2015) give the following sufficient conditions for a distribution of matrices to be an  $\varepsilon$ -lopsided embedding for  $(A, B)$ . For the sake of completeness we reproduce their proof here.

**Lemma B.2** (Sufficient Conditions). *Given matrices  $(A, B)$ , let  $\mathbf{S}$  be a matrix drawn from a distribution such that*

1. *the matrix  $\mathbf{S}$  is a subspace  $\varepsilon$ -contraction for  $A$  with respect to  $\|\cdot\|_2$ , i.e., simultaneously for all vectors  $x$*

$$\|\mathbf{S}Ax\|_2 \geq (1 - \varepsilon)\|Ax\|_2$$

*with probability  $1 - \delta/3$ ,*

2. *for all  $i \in [d']$ , with probability at least  $1 - \delta\varepsilon^2/3$  the matrix  $\mathbf{S}$  is a subspace  $\varepsilon^2$ -contraction for  $[A \ B_{*i}]$  with respect to  $\|\cdot\|_2$ , i.e., for all vectors  $x$ ,*

$$\|\mathbf{S}Ax - \mathbf{S}B_{*i}\|_2 \geq (1 - \varepsilon^2)\|Ax - B_{*i}\|_2,$$

*and*

3. *the matrix  $\mathbf{S}$  is an  $\varepsilon^2$ -dilation for  $B^*$  with respect to  $\|\cdot\|_h$ , i.e.,  $\|\mathbf{S}B^*\|_h \leq (1 + \varepsilon^2)\|B^*\|_h$  with probability  $\geq 1 - \delta/3$ .*

In the Condition 3 above,  $B^* = AX^* - B$  where  $X^* = \arg \min_X \|AX - B\|_h$ . With failure probability at most  $\delta$ , the matrix  $\mathbf{S}$  is an affine  $6\varepsilon$ -contraction for  $(A, B)$  with respect to  $\|\cdot\|_h$ , i.e., for all matrices  $X$ ,

$$\|\mathbf{S}(AX - B)\|_h \geq (1 - 6\varepsilon)\|AX - B\|_h$$

and therefore a lopsided  $6\varepsilon$ -embedding for  $(A, B)$  with respect to  $\|\cdot\|_h$ .

Importantly, note that Condition 2 in the lemma is about the probability of  $\mathbf{S}$  being a subspace contraction for  $[A B_{*i}]$  separately for each  $i$  and *not* the probability of  $\mathbf{S}$  being *simultaneously* a subspace contraction for  $[A B_{*i}]$  for all  $i \in [d']$ .

*Proof.* Condition on the event that 1 and 3 hold. For  $i \in [d']$ , let  $\mathbf{Z}_i$  be an indicator random variable where  $\mathbf{Z}_i = 0$  if the matrix  $\mathbf{S}$  is a subspace  $\varepsilon^2$ -contraction for  $[A B_{*i}]$  and  $\mathbf{Z}_i = 1$  otherwise. From the properties of  $\mathbf{S}$ , we have that  $\Pr[\mathbf{Z}_i = 1] \leq \delta\varepsilon^2/3$  for all  $i$ . If  $\mathbf{Z}_i = 1$ , we call  $i$  *bad* and if  $\mathbf{Z}_i = 0$ , we call  $i$  *good*.

Consider an arbitrary matrix  $X$ . Say a *bad*  $i$  is *large* if  $\|(AX - B)_{*i}\|_2 \geq (1/\varepsilon)(\|B_{*i}\|_2 + \|\mathbf{S}B_{*i}\|_2)$ , otherwise a *bad*  $i$  is *small*. We have

$$\sum_{\text{small } i} \|(AX - B)_{*i}\|_2 \leq (1/\varepsilon) \sum_{\text{small } i} (\|B_{*i}\|_2 + \|\mathbf{S}B_{*i}\|_2) \leq (1/\varepsilon) \sum_{\text{bad } i} (\|B_{*i}\|_2 + \|\mathbf{S}B_{*i}\|_2). \quad (3)$$

Using condition 2, we obtain that  $\mathbb{E}[\sum_{\text{bad } i} \|B_{*i}^*\|_2] \leq (\delta\varepsilon^2/3) \sum_i \|B_{*i}^*\|_2 \leq (\delta\varepsilon^2/3)\Delta^*$ . By a Markov bound, we have that with probability  $\geq 1 - \delta/3$ ,  $\sum_{\text{bad } i} \|B_{*i}^*\|_2 \leq \varepsilon^2\Delta^*$ . Assume that this event holds. Similarly,

$$\begin{aligned} \sum_{\text{bad } i} \|\mathbf{S}B_{*i}^*\|_2 &= \|\mathbf{S}B^*\|_h - \sum_{\text{good } i} \|\mathbf{S}B_{*i}^*\|_2 \\ &\leq (1 + \varepsilon^2)\Delta^* - (1 - \varepsilon^2) \sum_{\text{good } i} \|B_{*i}^*\|_2 \\ &\leq (1 + \varepsilon^2)\Delta^* - (1 - \varepsilon^2)(\Delta^* - \varepsilon^2\Delta^*) \\ &\leq 3\varepsilon^2\Delta^*. \end{aligned}$$

Thus, we can bound the RHS of (3) and obtain

$$\sum_{\text{small } i} \|(AX - B)_{*i}\|_2 \leq (1/\varepsilon)(\varepsilon^2\Delta^* + 3\varepsilon^2\Delta^*) \leq 4\varepsilon\Delta^*.$$

Now we lower bound  $\sum_{\text{bad } i} \|\mathbf{S}(AX - B)_{*i}\|_2$ .

$$\begin{aligned} \sum_{\text{bad } i} \|\mathbf{S}(AX - B)_{*i}\|_2 &\geq \sum_{\text{large } i} \|\mathbf{S}(AX - B)_{*i}\|_2 \\ &\geq \sum_{\text{large } i} \|\mathbf{S}(AX - AX^*)_{*i}\|_2 - \|\mathbf{S}B_{*i}^*\|_2 \\ &\geq \sum_{\text{large } i} (1 - \varepsilon)\|(AX - AX^*)_{*i}\|_2 - \|\mathbf{S}B_{*i}^*\|_2 \\ &\geq \sum_{\text{large } i} (1 - \varepsilon)\|(AX - B)_{*i}\|_2 - (1 - \varepsilon)\|B_{*i}^*\|_2 - \|\mathbf{S}B_{*i}^*\|_2 \\ &\geq \sum_{\text{large } i} (1 - \varepsilon)\|(AX - B)_{*i}\|_2 - \varepsilon\|(AX - B)_{*i}\|_2 \\ &\geq (1 - 2\varepsilon) \sum_{\text{large } i} \|(AX - B)_{*i}\|_2. \end{aligned}$$

In the above, we repeatedly used the triangle inequality for the  $\|\cdot\|_2$  norm, and that  $\mathbf{S}$  is a subspace  $\varepsilon$ -embedding for matrix  $A$  and for large  $i$ , we upper bound  $(1 - \varepsilon)\|B_{*i}^*\|_2 + \|\mathbf{S}B_{*i}^*\|_2$  by  $\varepsilon\|(AX - B)_{*i}\|_2$ . We can finally lower bound

$\|\mathbf{S}(AX - B)\|_h$ .

$$\begin{aligned}
 \|\mathbf{S}(AX - B)\|_h &= \sum_{\text{good } i} \|\mathbf{S}(AX - B)_{*i}\|_2 + \sum_{\text{bad } i} \|\mathbf{S}(AX - B)_{*i}\|_2 \\
 &\geq (1 - \varepsilon^2) \sum_{\text{good } i} \|(AX - B)_{*i}\|_2 + (1 - 2\varepsilon) \sum_{\text{large } i} \|(AX - B)_{*i}\|_2 \\
 &\geq (1 - \varepsilon^2) \sum_{\text{good } i} \|(AX - B)_{*i}\|_2 + (1 - 2\varepsilon) \sum_{\text{bad } i} \|(AX - B)_{*i}\|_2 \\
 &\quad - (1 - 2\varepsilon) \sum_{\text{small } i} \|(AX - B)_{*i}\|_2 \\
 &\geq (1 - 2\varepsilon) \|AX - B\|_h - (1 - 2\varepsilon) 4\varepsilon \Delta^* \\
 &\geq (1 - 6\varepsilon) \|AX - B\|_h.
 \end{aligned}$$

Thus, by a union bound, with failure probability  $\leq \delta$ ,  $\mathbf{S}$  is an affine  $6\varepsilon$ -contraction for  $(A, B)$  with respect to  $\|\cdot\|_h$ .  $\square$

**Lemma B.3** (Gaussian Matrices are Lopsided Embeddings). *Given arbitrary matrices  $A$  of rank  $k$  and  $B$  of any rank, a Gaussian matrix  $\mathbf{S}$  with  $\tilde{O}(k/\varepsilon^4 + 1/\varepsilon^4 \delta^2)$  rows is an  $\varepsilon$ -lopsided embedding for  $(A, B)$  with probability  $\geq 1 - \delta$ .*

*Proof.* We now show that a Gaussian matrix, with small dimension equal to  $\tilde{O}(k/\varepsilon^4 + 1/\varepsilon^4 \delta^2)$ , satisfies all of the sufficient conditions of Lemma B.2. Clearly, a Gaussian matrix with  $O((k + \log(1/\delta))/\varepsilon^2)$  rows satisfies condition 1 and a Gaussian matrix with  $O((k + \log(1/\delta\varepsilon))/\varepsilon^4)$  rows satisfies condition 2 (Woodruff, 2014).

We now show that a Gaussian matrix with at least  $O(1/\varepsilon^4)$  rows satisfies

$$\mathbb{E}[(\|\mathbf{S}y\|_2^2 - 1)^2] \leq \varepsilon^4$$

for any given unit vector  $y$ . If  $\mathbf{S}$  is a Gaussian matrix of  $t$  rows with each entry drawn i.i.d. from  $N(0, 1/t)$ , then the entries of  $Sy$  are each drawn i.i.d. from  $N(0, \|y\|_2^2/t) = N(0, 1/t)$ . Therefore,  $\|\mathbf{S}y\|_2^2 = \mathbf{Y}_1^2 + \dots + \mathbf{Y}_t^2$ , where  $\mathbf{Y}_i \sim N(0, 1/t)$ , which gives

$$\begin{aligned}
 \mathbb{E}[(\|\mathbf{S}y\|_2^2 - 1)^2] &= \mathbb{E}[(\mathbf{Y}_1^2 + \dots + \mathbf{Y}_t^2 - 1)^2] \\
 &= t\mathbb{E}[\mathbf{Y}_1^4] + 1 + 2\binom{t}{2}\mathbb{E}[\mathbf{Y}_1^2\mathbf{Y}_2^2] - 2t\mathbb{E}[\mathbf{Y}_1^2] = t\frac{3}{t^2} + 1 + 2\binom{t}{2}\frac{1}{t^2} - 2t\frac{1}{t} \\
 &= 2/t.
 \end{aligned}$$

Thus, with  $t \geq 1/\varepsilon^4$ , we have that  $\mathbb{E}[(\|\mathbf{S}y\|_2^2 - 1)^2] \leq \varepsilon^4$ . By Lemma 28 of (Clarkson and Woodruff, 2015), we obtain that  $\mathbb{E}[\max(\|\mathbf{S}y\|_2^4, 1)] \leq (1 + \varepsilon^2)^2 \leq 1 + 3\varepsilon^2$ . Now, by Holder's inequality,

$$\mathbb{E}[\max(\|\mathbf{S}y\|_2, 1)] \leq \mathbb{E}[\max(\|\mathbf{S}y\|_2, 1)^4]^{1/4} \leq (1 + 3\varepsilon^2)^{1/4} \leq 1 + (3/4)\varepsilon^2.$$

As  $(\|\mathbf{S}y\|_2 - 1)_+ = \max(\|\mathbf{S}y\|_2, 1) - 1$ , we obtain that  $\mathbb{E}[(\|\mathbf{S}y\|_2 - 1)_+] \leq (3/4)\varepsilon^2$ , which implies by scaling that for an arbitrary vector  $y$ ,

$$\mathbb{E}[(\|\mathbf{S}y\|_2 - \|y\|_2)_+] \leq (3/4)\varepsilon^2 \|y\|_2$$

which gives

$$\mathbb{E}[(\|\mathbf{S}B^*\|_h - \|B^*\|_h)_+] \leq (3/4)\varepsilon^2 \|B^*\|_h.$$

By Markov's inequality, with probability  $\geq 1 - \delta/3$ ,  $(\|\mathbf{S}B^*\|_h - \|B^*\|_h)_+ \leq (9/4)(\varepsilon^2/\delta)\|B^*\|_h$  and hence, with probability  $\geq 1 - \delta/3$ ,  $\|\mathbf{S}B^*\|_h \leq (1 + (9/4)(\varepsilon^2/\delta))\|B^*\|_h$ . Thus, a Gaussian matrix with  $m = O(1/\varepsilon^4 \delta^2)$  rows satisfies that with probability  $\geq 1 - \delta/3$  that

$$\|\mathbf{S}B^*\|_h \leq (1 + \varepsilon^2)\|B^*\|_h. \quad \square$$

**B.2. Utilizing Sampling based  $\ell_1$  embeddings**

Let  $A$  be a matrix that has  $r$  columns. Suppose  $\mathbf{L}$  is a random matrix such that with probability  $\geq 9/10$ , simultaneously for all vectors  $y$ ,

$$\alpha \|Ay\|_1 \leq \|\mathbf{L}Ay\|_1 \leq \beta \|Ay\|_1.$$

Assume the above event holds. Let  $X$  be an arbitrary matrix with  $t$  columns. We have that for a suitably scaled Gaussian matrix  $\mathbf{G}$  with  $\tilde{O}(t/\varepsilon^2)$  columns, with probability  $\geq 9/10$ , simultaneously for all vectors  $x \in \mathbb{R}^t$ ,  $\|x^\top \mathbf{G}\|_1 = (1 \pm \varepsilon) \|x\|_2$  (Matoušek, 2013). Thus there exists a matrix  $M$  with  $\tilde{O}(t/\varepsilon^2)$  columns such that for all vectors  $x \in \mathbb{R}^t$ ,

$$\|x^\top M\|_1 = (1 \pm \varepsilon) \|x\|_2.$$

Therefore,

$$\frac{1}{1 + \varepsilon} \|AXM\|_{1,1} \leq \|AX\|_{1,2} = \frac{1}{1 - \varepsilon} \|AXM\|_{1,1}$$

and

$$\frac{1}{1 + \varepsilon} \|\mathbf{L}AXM\|_{1,1} \leq \|\mathbf{L}AX\|_{1,2} \leq \frac{1}{1 - \varepsilon} \|\mathbf{L}AXM\|_{1,1}$$

Now we upper bound  $\|\mathbf{L}AX\|_{1,2}$ .

$$\begin{aligned} \|\mathbf{L}AX\|_{1,2} &\leq \frac{1}{1 - \varepsilon} \|\mathbf{L}AXM\|_{1,1} \leq \frac{1}{1 - \varepsilon} \sum_j \| \mathbf{L}A(XM)_{*j} \|_1 \\ &\leq \frac{\beta}{1 - \varepsilon} \sum_j \|A(XM)_{*j}\|_1 = \frac{\beta}{1 - \varepsilon} \|AXM\|_{1,1} \leq \beta \frac{1 + \varepsilon}{1 - \varepsilon} \|AX\|_{1,2}. \end{aligned}$$

We now lower bound  $\|\mathbf{L}AX\|_{1,2}$  similarly.

$$\begin{aligned} \|\mathbf{L}AX\|_{1,2} &\geq \frac{1}{1 + \varepsilon} \|\mathbf{L}AXM\|_{1,1} = \frac{1}{1 + \varepsilon} \sum_j \| \mathbf{L}A(XM)_{*j} \|_1 \\ &\geq \frac{\alpha}{1 + \varepsilon} \sum_j \|A(XM)_{*j}\|_1 = \frac{\alpha}{1 + \varepsilon} \|AXM\|_{1,1} \geq \alpha \frac{1 - \varepsilon}{1 + \varepsilon} \|AX\|_{1,2}. \end{aligned}$$

By picking appropriate  $\varepsilon$ , we conclude that for any matrix  $X$ ,

$$\frac{\alpha}{2} \|AX\|_{1,2} \leq \|\mathbf{L}AX\|_{1,2} \leq 2\beta \|AX\|_{1,2}. \quad (4)$$

**Lemma B.4.** *If  $\mathbf{S}^\top$  is a random Gaussian matrix with  $O(k)$  columns such that with probability  $\geq 9/10$ ,*

$$\min_{\text{rank-}k \ X} \|\mathbf{A}\mathbf{S}^\top X - A\|_{1,2} \leq (3/2) \min_{\text{rank-}k \ X} \|AX - A\|_{1,2},$$

*and if  $\mathbf{L}$  is a random matrix drawn from a distribution such that with probability  $\geq 9/10$  over the draw of matrix  $\mathbf{L}$ ,*

$$\alpha \|\mathbf{A}\mathbf{S}^\top y\|_1 \leq \|\mathbf{L}\mathbf{A}\mathbf{S}^\top y\|_1 \leq \beta \|\mathbf{A}\mathbf{S}^\top y\|_1$$

*for all vectors  $y$  and*

$$\mathbb{E}_{\mathbf{L}} [\|\mathbf{L}M\|_{1,2}] = \|M\|_{1,2}$$

*for any matrix  $M$ , then with probability  $\geq 3/5$ , all matrices  $X$  such that  $\|\mathbf{L}\mathbf{A}\mathbf{S}^\top X - \mathbf{L}A\|_{1,2} \leq 10 \cdot \text{SubApx}_{k,1}(A)$  satisfy*

$$\|\mathbf{A}\mathbf{S}^\top X - A\|_{1,2} \leq (2 + 40/\alpha) \text{SubApx}_{k,1}(A).$$

*Proof.* Let  $X_1 = \arg \min_{\text{rank-}k} X \|AS^\top X - A\|_{1,2}$ . With probability  $\geq 9/10$ , we have that  $\|AS^\top X_1 - A\|_{1,2} \leq (3/2)\text{SubApx}_{k,1}(A)$ . By a Markov bound, we obtain that with probability  $\geq 4/5$ ,  $\|\mathbf{L}AS^\top X_1 - \mathbf{L}A\|_{1,2} \leq 10\text{SubApx}_{k,1}(A)$ . Assume this event holds. For any matrix  $X$ ,

$$\|\mathbf{L}AS^\top X - \mathbf{L}A\|_{1,2} \geq \|\mathbf{L}AS^\top X - \mathbf{L}AS^\top X_1\|_{1,2} - \|\mathbf{L}AS^\top X_1 - \mathbf{L}A\|_{1,2}.$$

We have

$$\|\mathbf{L}AS^\top X - \mathbf{L}A\|_{1,2} \geq \|\mathbf{L}AS^\top X - \mathbf{L}AS^\top X_1\|_{1,2} - 10 \cdot \text{SubApx}_{k,1}(A).$$

From (4), we have

$$\begin{aligned} \|\mathbf{L}AS^\top X - \mathbf{L}A\|_{1,2} &\geq \frac{\alpha}{2} \|\mathbf{L}AS^\top X - AS^\top X_1\|_{1,2} - 10 \cdot \text{SubApx}_{k,1}(A) \\ &\geq \frac{\alpha}{2} \|\mathbf{L}AS^\top X - A\|_{1,2} - \frac{\alpha}{2} \|\mathbf{L}AS^\top X_1 - A\|_{1,2} - 10 \cdot \text{SubApx}_{k,1}(A) \\ &\geq \frac{\alpha}{2} \|\mathbf{L}AS^\top X - A\|_{1,2} - (3\alpha/4 + 10) \cdot \text{SubApx}_{k,1}(A). \end{aligned}$$

Thus, for any matrix  $X$  of rank  $r$ , if  $\|\mathbf{L}AS^\top X - A\|_{1,2} > (2/\alpha)(20 + 3\alpha/4) \cdot \text{SubApx}_{k,1}(A)$ , then  $\|\mathbf{L}AS^\top X - \mathbf{L}A\|_{1,2} > 10 \cdot \text{SubApx}_{k,1}(A)$ .  $\square$

### B.3. Main Theorem for constructing an $(O(1), \tilde{O}(k))$ -bicriteria solution

**Theorem B.1.** *Given any matrix  $A \in \mathbb{R}^{n \times d}$  and a matrix  $B \in \mathbb{R}^{d \times c_1}$  with orthonormal columns, Algorithm 1 returns a matrix  $\tilde{X}$  with  $\tilde{O}(k)$  orthonormal columns that with probability  $1 - \delta$  satisfies*

$$\|A(I - BB^\top)(I - \tilde{X}\tilde{X}^\top)\|_{1,2} \leq O(1) \cdot \text{SubApx}_{k,1}(A(I - BB^\top)),$$

in time  $\tilde{O}((\text{nnz}(A) + d\text{poly}(k/\varepsilon)) \log(1/\delta))$ .

*Proof.* It is shown in Lemma B.3 that a Gaussian matrix with  $O(k)$  rows is a  $1/6$ -lopsided embedding for  $(V_k, A^\top)$  with probability  $\geq 9/10$ . Thus by Lemma B.1, we obtain that

$$\min_{\text{rank-}k} X \|A(I - BB^\top)\mathbf{S}^\top X - A(I - BB^\top)\|_{1,2} \leq (3/2)\text{SubApx}_{k,1}(A(I - BB^\top))$$

with probability  $\geq 9/10$ . (Cohen and Peng, 2015) show that a sampling matrix  $\mathbf{L}$  obtained using Lewis weights has  $\tilde{O}(k)$  rows and is a  $(1/2, 3/2)$   $\ell_1$  subspace embedding for the matrix  $A(I - BB^\top)\mathbf{S}^\top$ . Thus, the matrices  $\mathbf{S}^\top$  and  $\mathbf{L}$  constructed in Algorithm 1 satisfy the conditions of Lemma 4.1. Therefore from Lemma B.4, with probability  $\geq 3/5$ , if a matrix  $X$  satisfies  $\|\mathbf{L}A(I - BB^\top)\mathbf{S}^\top X - \mathbf{L}A(I - BB^\top)\|_{1,2} \leq 10 \cdot \text{SubApx}_{k,1}(A(I - BB^\top))$ , then  $\|A(I - BB^\top)\mathbf{S}^\top X - A(I - BB^\top)\|_{1,2} \leq 82 \cdot \text{SubApx}_{k,1}(A(I - BB^\top))$ .

Let  $\tilde{X} = \arg \min_{\text{rank-}k} X \|A(I - BB^\top)\mathbf{S}^\top X - A(I - BB^\top)\|_{1,2}$ . We have  $\|A(I - BB^\top)\mathbf{S}^\top \tilde{X} - A(I - BB^\top)\|_{1,2} \leq (3/2)\text{SubApx}_{k,1}(A(I - BB^\top))$ . By Markov's bound, with probability  $\geq 3/4$ ,  $\|\mathbf{L}A(I - BB^\top)\mathbf{S}^\top \tilde{X} - \mathbf{L}A(I - BB^\top)\|_{1,2} \leq 10 \cdot \text{SubApx}_{k,1}(A(I - BB^\top))$ . We now have the following:

$$\|\mathbf{L}A(I - BB^\top)\mathbf{S}^\top \tilde{X}(\mathbf{L}A(I - BB^\top))^+ \mathbf{L}A(I - BB^\top) - \mathbf{L}A(I - BB^\top)\|_{1,2} \leq 10 \cdot \text{SubApx}_{k,1}(A(I - BB^\top)).$$

Thus  $\|A(I - BB^\top)\mathbf{S}^\top \tilde{X}(\mathbf{L}A(I - BB^\top))^+ \mathbf{L}A(I - BB^\top) - A(I - BB^\top)\|_{1,2} \leq 82 \cdot \text{SubApx}_{k,1}(A(I - BB^\top))$ . Finally,

$$\begin{aligned} &\|A(I - BB^\top)(\mathbf{L}A(I - BB^\top))^+ (\mathbf{L}A(I - BB^\top)) - A(I - BB^\top)\|_{1,2} \\ &\leq \|A(I - BB^\top)\mathbf{S}^\top \tilde{X}(\mathbf{L}A(I - BB^\top))^+ \mathbf{L}A(I - BB^\top) - A(I - BB^\top)\|_{1,2} \\ &\leq 82 \cdot \text{SubApx}_{k,1}(A(I - BB^\top)). \end{aligned}$$

The first inequality follows from the fact that for all  $x$  and  $y$ ,  $\|x^\top(\mathbf{L}A)^+(\mathbf{L}A) - x^\top\|_2 \leq \|y^\top(\mathbf{L}A)^+(\mathbf{L}A) - y^\top\|_2$ .

By a union bound, with probability  $\geq 1/2$ , the matrix  $\widehat{X}$  computed by Algorithm 1, which is an orthonormal basis for the row space of  $LA(I - BB^\top)$ , satisfies

$$\|A(I - BB^\top)(I - \widehat{X}\widehat{X}^\top)\|_{1,2} \leq 82 \cdot \text{SubApx}_{k,1}(A(I - BB^\top)).$$

Thus the matrix  $\widehat{X}$  which has the minimum value over  $\widetilde{O}(\log(1/\delta))$  trials satisfies with probability  $\geq 1 - \delta$  that

$$\|A(I - BB^\top)(I - \widehat{X}\widehat{X}^\top)\|_{1,2} \leq O(1) \cdot \text{SubApx}_{k,1}(A(I - BB^\top)).$$

The running time of Lewis weight sampling can be seen to be  $O((\text{nnz}(A) + k^2 d(c_1 + k)) \log(\log(n)))$  from (Cohen and Peng, 2015). Thus, the total running time is  $\widetilde{O}((\text{nnz}(A) + k^2 d(c_1 + k)) \log(1/\delta))$ .  $\square$

#### B.4. Finding Best Solution Among Candidate Solutions

Algorithm 1 finds candidate solutions  $\widehat{X}^{(1)}, \dots, \widehat{X}^{(t)}$  for  $t = O(\log(1/\delta))$  and returns the best candidate solution that minimizes the cost

$$\|A(I - BB^\top)(I - \widehat{X}\widehat{X}^\top)\|_{1,2}. \quad (5)$$

The proof of Theorem 4.1 shows that, for all  $i = 1, \dots, t$ , with probability  $\geq 3/5$ ,  $\|A(I - BB^\top)(I - \widehat{X}^{(i)}(\widehat{X}^{(i)})^\top)\|_{1,2} \leq O(1) \cdot \text{SubApx}_{k,1}(A(I - BB^\top))$ . Therefore with probability  $\geq 1 - \delta/2$

$$\min_i \|A(I - BB^\top)(I - \widehat{X}^{(i)}(\widehat{X}^{(i)})^\top)\|_{1,2} \leq O(1) \cdot \text{SubApx}_{k,1}(A(I - BB^\top)) \quad (6)$$

i.e., with probability  $\geq 1 - \delta$ , there is a solution  $\widehat{X}^{(i)}$  among the  $t$  potential solutions that has a cost at most  $O(1) \cdot \text{SubApx}_{k,1}(A(I - BB^\top))$ . We first compute

$$\text{apx}_i = \|A(I - BB^\top)(I - \widehat{X}^{(i)}(\widehat{X}^{(i)})^\top)\mathbf{G}\|_{1,2}$$

where  $\mathbf{G}$  is a scaled Gaussian matrix with  $O(\log(n/\delta))$  columns. Values of  $\text{apx}_j$  for all  $j \in [t]$  can be computed in time  $\widetilde{O}((\text{nnz}(A) + (n + d)\text{poly}(k/\varepsilon)) \cdot \log(1/\delta))$ . We have using the union bound that, with probability  $\geq 1 - \delta/2$ , for all  $j \in [n]$  and  $i \in [t]$  that

$$\|A_{j*}(I - BB^\top)(I - \widehat{X}^{(i)}(\widehat{X}^{(i)})^\top)\mathbf{G}\|_2 = (1/2, 3/2)\|A_{j*}(I - BB^\top)(I - \widehat{X}^{(i)}(\widehat{X}^{(i)})^\top)\|_2. \quad (7)$$

Therefore with probability  $\geq 1 - \delta/2$ , for all  $i \in [t]$ ,

$$\text{apx}_i \in (1/2, 3/2)\|A(I - BB^\top)(I - \widehat{X}^{(i)}(\widehat{X}^{(i)})^\top)\|_{1,2}. \quad (8)$$

Let  $\tilde{i} = \arg \min_{i \in [t]} \text{apx}_i$  and  $i^* = \arg \min_{i \in [t]} \|A(I - BB^\top)(I - \widehat{X}^{(i)}(\widehat{X}^{(i)})^\top)\|_{1,2}$ . By a union bound, with probability  $\geq 1 - \delta$

$$\begin{aligned} \|A(I - BB^\top)(I - \widehat{X}^{(\tilde{i})}(\widehat{X}^{(\tilde{i})})^\top)\|_{1,2} &\leq 2\text{apx}_{\tilde{i}} \\ &\leq 2\text{apx}_{i^*} \\ &\leq 4\|A(I - BB^\top)(I - \widehat{X}^{(i^*)}(\widehat{X}^{(i^*)})^\top)\|_{1,2} \\ &\leq O(1) \cdot \text{SubApx}_{k,1}(A(I - BB^\top)). \end{aligned}$$

Thus, Algorithm 1, with probability  $\geq 1 - \delta$ , returns a subspace that has cost at most  $O(\sqrt{k}) \cdot \text{SubApx}_{k,1}(A(I - BB^\top))$  and has a running time of  $\widetilde{O}((\text{nnz}(A) + (n + d)\text{poly}(k/\varepsilon)) \cdot \log(1/\delta))$ .

#### B.5. Main Theorem for Constructing a $(1 + \varepsilon, k^{3.5}/\varepsilon^2)$ Bicriteria Solution

**Theorem B.2** (Residual Sampling). *Given matrix  $A \in \mathbb{R}^{n \times d}$ , matrices  $B \in \mathbb{R}^{d \times c_1}$  and  $\widehat{X} \in \mathbb{R}^{d \times c_2}$  with orthonormal columns such that  $\|A(I - BB^\top)(I - \widehat{X}\widehat{X}^\top)\|_{1,2} \leq K \cdot \text{SubApx}_{1,k}(A(I - BB^\top))$ , Algorithm 2 returns a matrix  $U$  having  $c = \widetilde{O}(c_2 + K \cdot k^3/\varepsilon^2 \cdot \log(1/\delta))$  orthonormal columns such that with probability  $\geq 1 - \delta$*

$$\|A(I - BB^\top)(I - UU^\top)\|_{1,2} \leq (1 + \varepsilon)\text{SubApx}_{1,k}(A(I - BB^\top)) \quad (9)$$

in time  $\widetilde{O}(\text{nnz}(A) + d \cdot \text{poly}(k/\varepsilon))$ . Moreover we also have that  $U^\top B = 0$ , i.e., the column spaces of  $U$  and  $B$  are orthogonal to each other.

*Proof.* As the matrix  $G$  is a Gaussian matrix with  $t = O(\log(n/\delta))$  columns, we have that with probability  $\geq 1 - (\delta/2)$ , for all  $i \in [n]$ ,

$$\|M_{i*}\|_2 = \|A_{i*}(I - BB^\top)(I - \widehat{X}\widehat{X}^\top)G\|_2 = (1 \pm 1/10)\|A_{i*}(I - BB^\top)(I - \widehat{X}\widehat{X}^\top)G\|_2.$$

Therefore, the probabilities  $p_i$  computed by Algorithm 2 are such that

$$p_i = \frac{\|M_{i*}\|_2}{\|M\|_{1,2}} \geq \frac{(9/10)\|A_{i*}(I - BB^\top)(I - \widehat{X}\widehat{X}^\top)\|_2}{(11/10)\|A(I - BB^\top)(I - \widehat{X}\widehat{X}^\top)\|_{1,2}} \geq \frac{9}{11} \frac{\|A_{i*}(I - BB^\top)(I - \widehat{X}\widehat{X}^\top)\|_2}{\|A(I - BB^\top)(I - \widehat{X}\widehat{X}^\top)\|_{1,2}}.$$

Hence, by applying Lemma 4.2 to the matrix  $A(I - BB^\top)$ , we obtain that with probability  $\geq 1 - \delta$ , the matrix  $U$  returned by Algorithm 2 satisfies

$$\|A(I - BB^\top)(I - UU^\top)\|_{1,2} \leq (1 + \varepsilon)\text{SubApx}_{1,k}(A(I - BB^\top)).$$

The matrix  $M$  can be computed in time  $O(\text{nnz}(A) \log(n/\delta) + (c_1 + c_2)d \log(n/\delta))$ . And  $s = \widetilde{O}(K \cdot k^3/\varepsilon^2 \cdot \log(1/\delta))$  independent samples can be drawn from the distribution  $p$  in time  $O(n + s)$ . Finally, the orthonormal basis  $U$  can be computed in time  $O(d(c + c_1)^2) = O(d\text{poly}(k/\varepsilon))$ .  $\square$

### C. Missing Proofs from Section 5

**Lemma C.1.** *With probability  $\geq 2/3$ , Algorithm 3 finds an  $\widetilde{O}(k^3/\varepsilon^3)$ -dimensional subspace  $S$  such that for all  $k$ -dimensional subspaces  $W$ ,*

$$\|A(I - \mathbb{P}_S)\|_{1,2} - \|A(I - \mathbb{P}_{S+W})\|_{1,2} \leq 4\varepsilon \cdot \text{SubApx}_{k,1}(A).$$

*Proof.* Suppose that the loop in Algorithm 3 is run for all  $t = 10/\varepsilon + 1$  iterations instead of stopping after  $i^*$  iterations. Let  $\widehat{X}_i, U_i, B_i$  be the values of the matrices in the algorithm at the end of  $i$  iterations. Let  $B_0 = []$  be the empty matrix. Condition on the event that all the calls to Algorithm 1 in the algorithm succeed. By a union bound over the failure event of each call to Algorithm 1, this event holds with probability  $\geq 9/10$ . Therefore, by Theorem 4.1, we obtain that

$$\begin{aligned} & \|A(I - \mathbb{P}_{B_{i-1}})(I - \mathbb{P}_{\widehat{X}_i})\|_{1,2} \\ & \leq \widetilde{O}(\sqrt{k}) \cdot \text{SubApx}_{k,1}(A(I - \mathbb{P}_{B_{i-1}})) \end{aligned}$$

for all  $i \in [10/\varepsilon + 1]$  and also that  $\widehat{X}_i$  has  $\widetilde{O}(k)$  columns. Now we condition on the event that all the calls to Algorithm 2 succeed. By a union bound, this holds with probability  $\geq 9/10$ . Thus we have

$$\begin{aligned} & \|A(I - \mathbb{P}_{B_i})\|_{1,2} = \|A(I - \mathbb{P}_{B_{i-1}})(I - \mathbb{P}_{U_i})\|_{1,2} \\ & \leq (1 + \varepsilon) \cdot \text{SubApx}_{k,1}(A(I - \mathbb{P}_{B_{i-1}})) \end{aligned}$$

for all iterations  $i \in [10/\varepsilon + 1]$  and also that  $U_i$  has  $\widetilde{O}(k^3/\varepsilon^2)$  columns which implies that  $B_i$  has  $\widetilde{O}(ik^3/\varepsilon^2)$  columns. In particular, we have that  $\|A(I - \mathbb{P}_{B_1})\|_{1,2} \leq (1 + \varepsilon)\text{SubApx}_{k,1}(A)$ . Therefore

$$\begin{aligned} & (1 + \varepsilon)\text{SubApx}_{k,1}(A) - \|A(I - \mathbb{P}_{B_i})\|_{1,2} \\ & \geq \|A(I - \mathbb{P}_{B_1})\|_{1,2} - \|A(I - \mathbb{P}_{B_i})\|_{1,2} \\ & = \sum_{i=2}^T \|A(I - \mathbb{P}_{B_{i-1}})\|_{1,2} - \|A(I - \mathbb{P}_{B_i})\|_{1,2} \geq 0. \end{aligned}$$

The last inequality follows from the fact that  $\text{colspace}(B_i) \supseteq \text{colspace}(B_{i-1})$ . The summation in the above equation has  $10/\varepsilon$  non-negative summands that all sum to at most  $(1 + \varepsilon)\text{SubApx}_{k,1}(A)$ . Therefore, at least  $9/\varepsilon$  summands have value  $\leq \varepsilon(1 + \varepsilon)\text{SubApx}_{k,1}(A)$ . In particular, with probability  $\geq 9/10$ ,

$$\|A(I - \mathbb{P}_{B_{i^*}})\|_{1,2} - \|A(I - \mathbb{P}_{B_{i^*+1}})\|_{1,2} \leq \varepsilon(1 + \varepsilon)\text{SubApx}_{k,1}(A).$$



But we also have that

$$\begin{aligned}
 \|A(I - \mathbb{P}_{B_{i^*+1}})\|_{1,2} &= \|A(I - \mathbb{P}_{B_{i^*}})(I - \mathbb{P}_{U_{i^*}})\|_{1,2} \\
 &\leq (1 + \varepsilon) \text{SubApx}_{k,1}(A(I - \mathbb{P}_{B_{i^*}})) \\
 &\leq (1 + \varepsilon) \|A(I - \mathbb{P}_{B_{i^*}})(I - \mathbb{P}_W)\|_{1,2} \\
 &= (1 + \varepsilon) \|A(I - \mathbb{P}_{B_{i^*}+W})\|_{1,2}
 \end{aligned}$$

where  $W$  is any rank  $k$  matrix. The second inequality follows from the fact that  $\text{SubApx}_{k,1}(A(I - \mathbb{P}_{B_{i^*}})) = \min_{\text{rank-}k \ W} \|A(I - \mathbb{P}_{B_{i^*}})(I - \mathbb{P}_W)\|_{1,2}$ . Therefore, for any rank- $k$  matrix  $W$ , we obtain that

$$\begin{aligned}
 &\|A(I - \mathbb{P}_{B_{i^*}})\|_{1,2} - \|A(I - \mathbb{P}_{B_{i^*} \cup W})\|_{1,2} \\
 &\leq \|A(I - \mathbb{P}_{B_{i^*}})\|_{1,2} - \frac{1}{1 + \varepsilon} \|A(I - \mathbb{P}_{B_{i^*+1}})\|_{1,2} \\
 &\leq \|A(I - \mathbb{P}_{B_{i^*}})\|_{1,2} - (1 - \varepsilon) \|A(I - \mathbb{P}_{B_{i^*+1}})\|_{1,2} \\
 &\leq (\|A(I - \mathbb{P}_{B_{i^*}})\|_{1,2} - \|A(I - \mathbb{P}_{B_{i^*+1}})\|_{1,2}) + \varepsilon \|A(I - \mathbb{P}_{B_{i^*+1}})\|_{1,2} \\
 &\leq 4\varepsilon \cdot \text{SubApx}_{k,1}(A). \quad \square
 \end{aligned}$$

**Theorem C.1.** *Given a matrix  $A \in \mathbb{R}^{n \times d}$ ,  $k \in \mathbb{Z}$  and an accuracy parameter  $\varepsilon > 0$ , Algorithm 4 returns a matrix  $B$  with  $\tilde{O}(k^3/\varepsilon^6)$  orthonormal columns and a matrix  $\text{Apx} = [X \ v]$  such that for any  $k$  dimensional shape  $S$ ,  $\sum_i \sqrt{\text{dist}(BX_{i^*}^\top, S)^2 + v_i^2} = (1 \pm \varepsilon) \sum_i \text{dist}(A_i, S)$ . The algorithm runs in time  $O(\text{nnz}(A)/\varepsilon^2 + (n + d)\text{poly}(k/\varepsilon))$ .*

*Proof.* From the above lemma, we have that the subspace  $B$  satisfies with probability  $\geq 9/10$ , that for any  $k$  dimensional subspace  $W$ ,

$$\|A(I - \mathbb{P}_B)\|_{1,2} - \|A(I - \mathbb{P}_{B \cup W})\|_{1,2} \leq \frac{\varepsilon^2}{80} \text{SubApx}_{k,1}(A). \quad (10)$$

From Theorem 2.10 of (Woodruff, 2014), we obtain that with probability  $\geq 9/10$ , for all  $i \in [n]$ , the matrix  $\mathbf{S}_j$  found for  $i \in [n]$  is such that  $\mathbf{S}_j$  is a  $\Theta(\varepsilon^2)$  subspace embedding for the matrix  $[B \ A_{i^*}^\top]$ . Therefore,  $x_i$  is such that

$$\|Bx_i - A_{i^*}^\top\|_2 \leq (1 + \Theta(\varepsilon^2)) \|(I - BB^\top)A_{i^*}^\top\|_2.$$

and  $v_i = (1 \pm \Theta(\varepsilon^2)) \|(I - BB^\top)A_{i^*}^\top\|_2$ . Now the proof follows from Theorem 3.1.  $\square$

## D. Missing Proofs from Section 6

### D.1. Obtaining an $(O(1), \text{poly}(k))$ Approximation

**Theorem D.1.** *Given  $A \in \mathbb{R}^{n \times d}$ ,  $B \in \mathbb{R}^{d \times c_1}$ ,  $k \in \mathbb{Z}$  and  $\delta$ , Algorithm 5 returns  $\hat{X}$  with  $\tilde{O}(k^{3.5})$  orthonormal columns that with probability  $1 - \delta$  satisfies*

$$\|A(I - BB^\top)(I - \hat{X}\hat{X}^\top)\|_{1,2} \leq O(1) \cdot \text{SubApx}_{k,1}(A(I - BB^\top)).$$

*Given that the matrices  $\mathbf{C}_1 A_{I_j}$  for all  $j \in [b]$  and  $\mathbf{W}A$  are precomputed for all  $O(\log(1/\delta))$  trials, the algorithm can be implemented in time  $\tilde{O}((nd/b) \cdot k^{3.5} + d\text{poly}(k/\varepsilon) \log(1/\delta))$ .*

*Proof.* The proof is similar to proof of Theorem 4.1. That proof only makes use of the facts that

1. for any fixed matrix  $M$ ,  $\mathbb{E}[\|\mathbf{L}M\|_{1,2}] = \mathbb{E}[\|M\|_{1,2}]$ ,
2. with probability  $\geq 9/10$ , for all vectors  $x$ ,  $(1/2)\|Ax\|_1 \leq \|\mathbf{L}Ax\|_1 \leq (3/2)\|Ax\|_1$ , and

to conclude with the statement in the theorem. We now show that the matrix  $\mathbf{L}$  computed by Algorithm 5 satisfies all the above three properties.

**Algorithm 5** POLYAPPROXDENSE

---

**Input:**  $A \in \mathbb{R}^{n \times d}$ ,  $B \in \mathbb{R}^{d \times c_1}$ ,  $k \in \mathbb{Z}$ ,  $\delta, b$   
**Output:**  $\hat{X} \in \mathbb{R}^{d \times c_2}$   
 cols  $\leftarrow O(k + 1/\delta^2)$   
 $\mathbf{S}^\top \leftarrow \mathcal{N}(0, 1)^{d \times \text{cols}}$   
 $\mathbf{W} \leftarrow \ell_1$  embedding for  $O(k)$  dimensions from (Wang and Woodruff, 2019)  
 $[Q, R] \leftarrow$  QR decomposition of  $(\mathbf{W}A)(I - BB^\top)\mathbf{S}^\top$   
 $I_1, \dots, I_b \leftarrow$  Equal size partition of  $[n]$  into  $b$  parts  
 $\mathbf{C}_1 \leftarrow$  Cauchy matrix with  $O(\log(n))$  rows  
**for**  $j = 1, \dots, b$  **do**  
      $M^{(j)} \leftarrow (\mathbf{C}_1 A_{I_j})(I - BB^\top)\mathbf{S}^\top R^{-1}$   
      $\text{apx}_j \leftarrow \sum_{\text{col} \in \text{cols}(M^{(j)})} \text{median}(\text{abs}(M_{*\text{col}}^{(j)}))$   
**end for**  
 $\mathbf{C} \leftarrow$  Cauchy matrix with  $O(\log(n))$  columns  
 samples  $\leftarrow \tilde{O}(k^{3.5})$   
 $\mathbf{L} \leftarrow []$   
**for** samples iterations **do**  
     Sample  $j \in [b]$  with probability proportional to  $\text{apx}_j$   
      $P^{(j)} \leftarrow A_{I_j}(I - BB^\top)\mathbf{S}^\top R^{-1}\mathbf{C}$   
     For  $i \in I_j$ ,  $p_i^{(j)} \leftarrow \text{median}(\text{abs}(P_{i*}^{(j)}))$   
     Sample  $i \in I_j$  with probability proportional to  $p_i^{(j)}$   
     Append  $\frac{1}{\frac{p_i^{(j)}}{\sum_{i \in I(j)} p_i^{(j)}} \cdot \frac{\text{apx}_j}{\sum_{j=1}^b \text{apx}_j} \cdot \text{samples}}$   $e_i^\top$  to matrix  $\mathbf{L}$   
**end for**  
 $\hat{X} \leftarrow$  Orthonormal Basis for  $\text{rowspan}(\mathbf{L}A(I - BB^\top))$   
 Repeat the above  $O(\log(1/\delta))$  times and return best  $\hat{X}$

---

Note that the random matrix  $\mathbf{L}$  is constructed by sampling  $N$  rows, where each row is independently equal to  $(1/Np_i)e_i^\top$  with probability  $p_i$ . Thus

$$\mathbb{E}[\|\mathbf{L}M\|_{1,2}] = \mathbb{E}[\sum_{i=1}^N \|\mathbf{L}_{i*}M\|_2] = N\mathbb{E}[\|\mathbf{L}_{1*}M\|_2] = N \sum_{j=1}^n \|(1/Np_j)e_j^\top M\|_{2p_j} = \sum_{j=1}^n \|M_{j*}\|_2 = \|M\|_{1,2}. \quad (11)$$

We now prove property 2. From Theorem 1.3 of (Wang and Woodruff, 2019), we have that  $\mathbf{W}$  has  $O(k \log(k))$  rows and that with probability  $\geq 99/100$ , for all vectors  $x$

$$\|A(I - BB^\top)\mathbf{S}^\top x\|_1 \leq \|\mathbf{W}A(I - BB^\top)\mathbf{S}^\top x\|_1 \leq O(k \log(k))\|A(I - BB^\top)\mathbf{S}^\top x\|.$$

Let  $\ell_i = \|A_{i*}(I - BB^\top)\mathbf{S}^\top R^{-1}\|_1$  for  $i \in [n]$ . From Theorem 6.1, if the probability that the  $i^{\text{th}}$  row is sampled is  $\geq (1/2)(\ell_i / \sum_{i'} \ell_{i'})$  for all  $i \in [n]$ , then the matrix  $\mathbf{L}$  constructed is a  $(1/2, 3/2)$   $\ell_1$ -subspace embedding with probability  $\geq 99/100$ . Now consider sampling a row of the matrix  $\mathbf{L}$  in the algorithm. We have that the sampled row is in the direction of  $e_i$  with probability  $(\text{apx}_{j(i)} / \sum_{j' \in [b]} \text{apx}_{j'}) \cdot (p_i^{j(i)} / \sum_{i' \in I_{j(i)}} p_{i'}^{j(i)})$ . We use  $j(i)$  to denote  $j \in [b]$  such that  $i \in I_j$ . We show that this probability is at least  $(1/2)(\ell_i / \sum_{i'} \ell_{i'})$ . For  $j \in [b]$ ,

$$\text{apx}_j = \sum_{\text{col}} \text{median}(\text{abs}(M_{*\text{col}}^{(j)})).$$

From Theorem 1 of (Indyk, 2006), we have with probability  $\geq 1 - 1/100b$  that

$$\text{median}(\text{abs}(M_{*\text{col}}^{(j)})) = (1 \pm 1/6)\|A_{I_j}(I - BB^\top)\mathbf{S}^\top R_{*\text{col}}^{-1}\|_1.$$

Thus  $\sum_{\text{col}} \text{median}(\text{abs}(M_{*\text{col}}^{(j)})) = (1 \pm 1/6) \sum_{\text{col}} \|A_{I_j}(I - BB^\top)\mathbf{S}^\top R_{*\text{col}}^{-1}\|_1 = (1 \pm 1/6) \sum_{i \in I_j} \|A_{i*}(I - BB^\top)\mathbf{S}^\top R^{-1}\|_1 = (1 \pm 1/6) \sum_{i \in I_j} \ell_i$ . Therefore, by a union bound, with probability  $\geq 99/100$ , for all  $j \in [b]$

$$\text{apx}_j = (1 \pm 1/6) \sum_{i \in I_j} \ell_i.$$

Again, from (Indyk, 2006), we obtain that with probability  $\geq 99/100$ , that for all  $i \in [n]$

$$\text{median}(\text{abs}(A_{i*}(I - BB^\top)\mathbf{S}^\top R^{-1}\mathbf{C})) = (1 \pm 1/6) \|A_{i*}(I - BB^\top)\mathbf{S}^\top R^{-1}\|_1 = (1 \pm 1/6) \ell_i.$$

Thus, with probability  $\geq 99/100$ , for all  $j$  and  $i \in I_j$ , we have  $p_{(i)}^{(j)} = (1 \pm 1/6) \ell_i$ . By a union bound, with probability  $\geq 98/100$ , the probability that an arbitrary row  $i$  is sampled in an iteration of the algorithm is

$$(\text{apx}_{j(i)} / \sum_{j' \in [b]} \text{apx}_{j'}) \cdot (p_i^{j(i)} / \sum_{i' \in I_j(i)} p_{i'}^{j(i)}) \geq \frac{5}{7} \frac{\sum_{i' \in I_j} \ell_{i'}}{\sum_{i' \in [n]} \ell_{i'}} \frac{5}{7} \frac{\ell_i}{\sum_{i' \in I_j} \ell_{i'}} \geq \frac{1}{2} \frac{\ell_i}{\sum_{i' \in [n]} \ell_{i'}}.$$

Thus by a union bound,  $\mathbf{L}$  is a  $(1/2, 3/2)$  subspace embedding. Now the proof and argument for the running time follow.  $\square$

## D.2. Obtaining a $(1 + \varepsilon, \text{poly}(k/\varepsilon))$ Solution

---

### Algorithm 6 EPSAPPROXDENSE

---

**Input:**  $A \in \mathbb{R}^{n \times d}$ ,  $B \in \mathbb{R}^{d \times c_1}$ ,  $\widehat{X} \in \mathbb{R}^{d \times c_2}$ ,  $k \in \mathbb{Z}$ ,  $K, \varepsilon, \delta, b$

**Output:**  $U \in \mathbb{R}^{d \times c}$

$t \leftarrow O(\log(n))$ ,  $\mathbf{G} \leftarrow \mathcal{N}(0, 1)^{d \times \text{cols}}$

$I_1, \dots, I_b \leftarrow$  Equal size partition of  $[n]$  into  $b$  parts

$\mathbf{C}_1 \leftarrow$  Cauchy matrix with  $O(\log(n))$  rows

**for**  $j = 1, \dots, b$  **do**

$$M^{(j)} \leftarrow (\mathbf{C}_1 A_{I_j})(I - BB^\top)(I - \widehat{X}\widehat{X}^\top)(\mathbf{G}/t)\sqrt{\pi/2}$$

$$\text{apx}_j \leftarrow \sum_{\text{col} \in \text{cols}(M^{(j)})} \text{median}(\text{abs}(M_{*\text{col}}^{(j)}))$$

**end for**

$\text{samples} \leftarrow \widetilde{O}(K \cdot k^3/\varepsilon^2 \cdot \log(1/\delta))$ ,  $\mathbf{S} \leftarrow \emptyset$

**for** samples iterations **do**

Sample  $j \in [b]$  with probability proportional to  $\text{apx}_j$

$$P^{(j)} \leftarrow A_{I_j}(I - BB^\top)(I - \widehat{X}\widehat{X}^\top)\mathbf{G}$$

For  $i \in I_j$ ,  $p_i^{(j)} \leftarrow \|P_{i*}^{(j)}\|_2$

Sample  $i \in I_j$  with probability proportional to  $p_i^{(j)}$

$$\mathbf{S} \leftarrow \mathbf{S} \cup i$$

**end for**

$$U \leftarrow \text{colspan}((I - BB^\top)[\widehat{X}(\mathbf{A}\mathbf{S})^\top])$$

**Return**  $U$

---

**Theorem D.2.** Given a matrix  $A \in \mathbb{R}^{n \times d}$ , orthonormal matrices  $B \in \mathbb{R}^{n \times c_1}$  and  $\widehat{X} \in \mathbb{R}^{n \times c_2}$  such that

$$\|A(I - BB^\top)(I - \widehat{X}\widehat{X}^\top)\|_{1,2} \leq K \cdot \text{SubApx}_{1,k}(A(I - BB^\top)),$$

and parameters  $k, \varepsilon$ , and  $\delta$ , Algorithm 6 outputs a matrix  $U$  with  $c = c_1 + \widetilde{O}(K \cdot k^3/\varepsilon^2 \cdot \log(1/\delta))$  orthonormal columns such that with probability  $\geq 1 - \delta$ ,

$$\|A(I - BB^\top)(I - UU^\top)\|_{1,2} \leq (1 + \varepsilon) \text{SubApx}_{1,k}(A(I - BB^\top)).$$

Given that  $\mathbf{C}_1 A_{I_j}$  is precomputed for all  $j \in [b]$ , the algorithm runs in time  $\widetilde{O}((nd/b) \cdot (K \cdot k^3/\varepsilon^2 \log(1/\delta)) + d \text{poly}(k/\varepsilon))$ .

*Proof.* We show that the probability that a row  $i$  is sampled in an iteration of the Algorithm is  $\geq (1/12)\|A_{i*}(I-BB^\top)(I-\widehat{X}\widehat{X}^\top)\|_2/\|A(I-BB^\top)(I-\widehat{X}\widehat{X}^\top)\|_{1,2}$ . Then the proof follows as in the proof of Theorem 4.2. First assume that  $\text{apx}_j$  for  $j \in [b]$  computed by the algorithm satisfies

$$\text{apx}_j = (1/2, 2) \sum_{i \in I_j} \|A_{i*}(I-BB^\top)(I-\widehat{X}\widehat{X}^\top)\|_2.$$

Now the probability  $p_i$  with which a row  $i$  is sampled by the algorithm is given by

$$p_i = \frac{\text{apx}_{j(i)}}{\sum_{j \in [b]} \text{apx}_j} \cdot \frac{\|A_{i*}(I-BB^\top)(I-\widehat{X}\widehat{X}^\top)\mathbf{G}\|_2}{\sum_{i' \in I_{j(i)}} \|A_{i'*}(I-BB^\top)(I-\widehat{X}\widehat{X}^\top)\mathbf{G}\|_2}.$$

As  $\mathbf{G}$  is a Gaussian matrix with  $t = O(\log(n/\delta))$  columns, we have that with probability  $\geq 1 - \delta$  that for all  $i' \in [n]$   $\|A_{i'*}(I-BB^\top)(I-\widehat{X}\widehat{X}^\top)\mathbf{G}\|_2 = (1 \pm 1/2)\|A_{i'*}(I-BB^\top)(I-\widehat{X}\widehat{X}^\top)\|_2 \cdot \sqrt{t}$ . Therefore

$$\begin{aligned} p_i &= \frac{\text{apx}_{j(i)}}{\sum_{j \in [b]} \text{apx}_j} \cdot \frac{\|A_{i*}(I-BB^\top)(I-\widehat{X}\widehat{X}^\top)\mathbf{G}\|_2}{\sum_{i' \in I_{j(i)}} \|A_{i'*}(I-BB^\top)(I-\widehat{X}\widehat{X}^\top)\mathbf{G}\|_2} \\ &\geq \frac{1}{12} \frac{\|A_{i*}(I-BB^\top)(I-\widehat{X}\widehat{X}^\top)\|_2}{\|A(I-BB^\top)(I-\widehat{X}\widehat{X}^\top)\|_{1,2}}. \end{aligned}$$

We now prove our assumption which concludes the proof.

Let  $x \in \mathbb{R}^d$  be an arbitrary vector. As  $\mathbf{G}$  is a Gaussian matrix with  $t = O(\log(n/\delta))$  columns, Lemma 5.3 of (Plan and Vershynin, 2013) states that

$$\Pr \left[ \left| \frac{1}{t} \|x^\top \mathbf{G}\|_1 - \sqrt{\frac{2}{\pi}} \|x\|_2 \right| \geq \alpha \|x\|_2 \right] \leq C \exp(-c\alpha^2).$$

Picking an appropriate  $\alpha = O(1)$ , by a union bound, with probability  $\geq 1 - \delta/3$ , we obtain

$$\begin{aligned} &\|A_{i*}(I-BB^\top)(I-\widehat{X}\widehat{X}^\top)(\mathbf{G}/t)\sqrt{\pi/2}\|_1 \\ &= (4/5, 6/5)\|A_{i*}(I-BB^\top)(I-\widehat{X}\widehat{X}^\top)\|_2 \end{aligned}$$

for all  $i \in [n]$ . Now, if  $C$  is a Cauchy matrix with  $O(\log(n/\delta))$  rows, then with probability  $1 - \delta/(3nb)$ , we have that

$$\text{median}(\text{abs}(Cx)) = (1 \pm 1/5)\|x\|_1.$$

Therefore, by a union bound, we obtain that, with probability  $\geq 1 - \delta/3$ , for all  $j \in [b]$  and  $i \in t$  that

$$\text{median}(\text{abs}(CA_{I_{j*}}(I-BB^\top)(I-\widehat{X}\widehat{X}^\top)\mathbf{G}_{*i})) = (1 \pm 1/5)\|A_{I_{j*}}(I-BB^\top)(I-\widehat{X}\widehat{X}^\top)\mathbf{G}_{*i}\|_1.$$

Therefore, with probability  $\geq 1 - 2\delta/3$ , for all  $j \in [b]$ ,

$$\begin{aligned} \text{apx}_j &= \sum_i \text{median}(\text{abs}((M^{(j)})_{*i})) = \sum_{i=1}^T \text{median}(\text{abs}(CA_{I_{j*}}(I-BB^\top)(I-\widehat{X}\widehat{X}^\top)(\mathbf{G}_{*i}/t)\sqrt{\pi/2})) \\ &= (1 \pm 1/5) \sum_{i=1}^T \|A_{I_{j*}}(I-BB^\top)(I-\widehat{X}\widehat{X}^\top)(\mathbf{G}_{*i}/t)\sqrt{\pi/2}\|_1 \\ &= (1 \pm 1/5) \sum_{i \in I_j} \|A_{i*}(I-BB^\top)(I-\widehat{X}\widehat{X}^\top)(\mathbf{G}/t)\sqrt{\pi/2}\|_1 \\ &= (4/5, 6/5)(4/5, 6/5) \sum_{i \in I_j} \|A_{i*}(I-BB^\top)(I-\widehat{X}\widehat{X}^\top)\|_2 \\ &= (1/2, 2) \sum_{i \in I_j} \|A_{i*}(I-BB^\top)(I-\widehat{X}\widehat{X}^\top)\|_2. \end{aligned}$$

The only term in the running time that involves a factor  $nd$  is in computing the matrix  $P^{(j)}$  for the chosen  $j$ . A total of  $\tilde{O}(K \cdot k^3/\varepsilon^2 \cdot \log(1/\delta))$  such  $j \in [b]$  are sampled. Therefore, the total running time for computing the matrices  $P^{(j)}$  for  $j$  sampled by the algorithm is equal to  $(nd/b) \cdot \log(n) \cdot \tilde{O}(K \cdot k^3/\varepsilon^2 \cdot \log(1/\delta)) + d \cdot \text{poly}(k/\varepsilon)$ .  $\square$

**Algorithm 7** DIMENSIONREDUCTIONDENSE

---

**Input:**  $A \in \mathbb{R}^{n \times d}$ ,  $k, \varepsilon > 0$ .  
**Output:**  $B \in \mathbb{R}^{d \times c}$  with orthonormal columns  
 $t \leftarrow 10/\varepsilon + 1$   
 $i^* \leftarrow$  uniformly random integer from  $[10/\varepsilon + 1]$ .  
 Initialize  $B \leftarrow []$   
 $b \leftarrow k^{3.5}/\varepsilon^3$   
 $\delta = \Theta(\varepsilon)$   
**for**  $i = 1, \dots, i^*$  **do**  
      $\hat{X} \leftarrow \text{POLYAPPROXDENSE}(A, B, k, \delta, b)$ .  
      $U \leftarrow \text{EPSAPPROXDENSE}(A, B, \hat{X}, k, \tilde{O}(\sqrt{k}), \Theta(\varepsilon), \delta, b)$ .  
      $B \leftarrow [B \mid U]$ .  
**end for**  
**Return**  $B$ .

---

**D.3. Overall Algorithm**

**Lemma D.1.** Given matrix  $A \in \mathbb{R}^{n \times d}$ ,  $k \in \mathbb{Z}$  and  $\varepsilon > 0$ , Algorithm 7 returns a matrix  $B$  with  $\tilde{O}(k^{3.5}/\varepsilon^3)$  orthonormal columns such that, with probability  $\geq 3/5$ , for all  $k$  dimensional spaces  $W$ ,

$$\|A(I - \mathbb{P}_B)\|_{1,2} - \|A(I - \mathbb{P}_{B \cup W})\|_{1,2} \leq \varepsilon \cdot \text{SubApx}_{k,1}(A).$$

The Algorithm runs in time  $\tilde{O}(nd + (n + d)\text{poly}(k/\varepsilon))$ .

*Proof.* The proof of the lemma is similar to that of Lemma C.1. We now argue that all the pre-computed matrices required across all the iterations of the algorithm can be computed in time  $\tilde{O}(nd)$ . The Cauchy matrix  $\mathbf{C}_1$  used in Algorithm 5 has  $O(\log(n))$  rows and the matrix  $\mathbf{W}$  has  $\tilde{O}(k)$  rows. Note that we have

$$\begin{bmatrix} \mathbf{C}_1 A_{I_1} \\ \mathbf{C}_1 A_{I_2} \\ \vdots \\ \mathbf{C}_1 A_{I_b} \\ \mathbf{W} A \end{bmatrix} = \begin{bmatrix} \mathbf{C}_1 & & & & \\ & \mathbf{C}_1 & & & \\ & & \ddots & & \\ & & & \mathbf{W} & \\ & & & & \mathbf{C}_1 \end{bmatrix} A.$$

Thus all the matrices required for Algorithm 5 can be computed by multiplying a  $\text{poly}(k/\varepsilon) \times n$  matrix with  $A$ . Similarly, we can compute all the matrices required for Algorithm 6 by computing the product of a  $\text{poly}(k/\varepsilon) \times n$  matrix with  $A$ . Thus, all the matrices required across all iterations of Algorithm 7 can be computed by multiplying a  $\text{poly}(k/\varepsilon) \times n$  matrix with  $A$ , which can be done in time  $\tilde{O}(nd)$  by the algorithm of Coppersmith (1982), assuming  $n \gg \text{poly}(k/\varepsilon)$ . Now each iteration of the loop in Algorithm 7 takes  $\tilde{O}((nd/b)k^{3.5}/\varepsilon^2 + (n + d)\text{poly}(k/\varepsilon))$  time. As there are  $O(1/\varepsilon)$  iterations, the algorithm runs in time  $\tilde{O}((nd/b)k^{3.5}/\varepsilon^3 + (n + d)\text{poly}(k/\varepsilon))$ . Since the value of  $b$  is chosen to be  $k^{3.5}/\varepsilon^3$ , we obtain that the running time of the algorithm is  $\tilde{O}(nd + (n + d)\text{poly}(k/\varepsilon))$ , including the time to compute the required pre-computed matrices.  $\square$

**E. Coreset Construction using Dimensionality Reduction**

Algorithm 8 gives the general algorithm to construct a coreset for any objective involving the sum-of-distances metric. In this section, we discuss the coreset construction for two such problems: the  $k$ -median and  $k$ -subspace approximation problems.

For  $(B, \text{Apx} = [X \ v])$  returned by Algorithm 4, we have the guarantee that, with probability  $\geq 9/10$ , for any  $k$ -dimensional shape  $S$ ,

$$\sum_i \sqrt{\text{dist}(BX_{i^*}^\top, S)^2 + v_i^2} = (1 \pm \varepsilon) \sum_i \text{dist}(A_{i^*}, S).$$

**Algorithm 8** CORESETCONSTRUCTION

**Input:**  $A \in \mathbb{R}^{n \times d}$ ,  $k$ ,  $\varepsilon$ 
**Output:** Coreset

 $(B, \text{Apx}) \leftarrow \text{COMPLETEDIMREDUCE}(A, k, \varepsilon)$ 

 Construct a coreset for the instance  $\text{Apx} \begin{bmatrix} B^\top & 0 \\ 0 & 1 \end{bmatrix}$  and return

Given a set  $S$ , let  $S_{+1}$  denote the set  $\{(s, 0) \mid s \in S\}$ . Let  $\text{diag}(B^\top, 1) = \begin{bmatrix} B^\top & 0 \\ 0 & 1 \end{bmatrix}$ . Using this notation, we have that

$$\sum_i \text{dist}(\text{Apx}_{i^*} \cdot \text{diag}(B^\top, 1), S_{+1}) = (1 \pm \varepsilon) \sum_i \text{dist}(A_{i^*}, S).$$

Using the above relation, we give a coreset construction for the  $k$ -subspace approximation and  $k$ -median problems. These constructions are as in (Sohler and Woodruff, 2018). For any matrix  $M$ , let  $M_{+1}$  denote the matrix  $M$  with a new column of 0s appended at the end and let  $M_{-1}$  denote the matrix  $M$  with the last column deleted.

**Theorem E.1** (Coreset for Subspace Approximation). *There exists a sampling-and-scaling matrix  $T$  that samples and scales  $\tilde{O}(k^3/\varepsilon^8)$  rows of the matrix  $\text{Apx}$  such that, with probability  $\geq 3/5$ , for any projection matrix  $P$  of rank  $k$  that projects onto a subspace  $S$  of dimension at most  $k$ , we have*

$$\begin{aligned} \|((T \cdot \text{Apx} \cdot \text{diag}(B^\top, 1))_{-1}P)_{+1} - T \cdot \text{Apx} \cdot \text{diag}(B^\top, 1)\|_{1,2} &= (1 \pm O(\varepsilon)) \|((\text{Apx} \cdot \text{diag}(B^\top, 1))_{-1}P)_{+1} - \text{Apx} \cdot \text{diag}(B^\top, 1)\|_{1,2} \\ &= (1 \pm O(\varepsilon)) \sum_i \text{dist}(A_i, S). \end{aligned}$$

This sampling matrix can be computed in time  $O(n \cdot \text{poly}(k/\varepsilon))$ .

*Proof.* We first have  $\|((\text{Apx} \cdot \text{diag}(B^\top, 1))_{-1}P)_{+1} - \text{Apx} \cdot \text{diag}(B^\top, 1)\|_{1,2} = \sum_i \|((\text{Apx}_{i^*} \cdot \text{diag}(B^\top, 1))_{-1}P)_{+1} - \text{Apx}_{i^*} \cdot \text{diag}(B^\top, 1)\|_2 = \sum_i \sqrt{\|(I - P)BX_{i^*}^\top\|_2^2 + v_i^2} = \sum_i \sqrt{\text{dist}(BX_{i^*}^\top, S)^2 + v_i^2} = (1 \pm \varepsilon) \sum_i \text{dist}(A_{i^*}, S)$ .

We now show  $\|((T \cdot \text{Apx} \cdot \text{diag}(B^\top, 1))_{-1}P)_{+1} - T \cdot \text{Apx} \cdot \text{diag}(B^\top, 1)\|_{1,2} = (1 \pm O(\varepsilon)) \|((\text{Apx} \cdot \text{diag}(B^\top, 1))_{-1}P)_{+1} - \text{Apx} \cdot \text{diag}(B^\top, 1)\|_{1,2}$  proving the claim. Let  $G$  be a Gaussian matrix with  $\tilde{O}(d/\varepsilon^2)$  columns. Then with probability  $\geq 9/10$ , for all  $x \in \mathbb{R}^{d+1}$ ,

$$\|x^\top G\|_1 = (1 \pm \varepsilon) \|x\|_2.$$

See (Sohler and Woodruff, 2018) for references. Thus we have that with probability  $\geq 9/10$ , for all projection matrices  $P$  of rank at most  $k$ , we have

$$\|((\text{Apx} \cdot \text{diag}(B^\top, 1))_{-1}P)_{+1}G - \text{Apx} \cdot \text{diag}(B^\top, 1)G\|_{1,1} = (1 \pm \varepsilon) \|((\text{Apx} \cdot \text{diag}(B^\top, 1))_{-1}P)_{+1} - \text{Apx} \cdot \text{diag}(B^\top, 1)\|_{1,2}.$$

Note that for any  $P$ , the columns of the matrix  $((\text{Apx} \cdot \text{diag}(B^\top, 1))_{-1}P)_{+1}G - \text{Apx} \cdot \text{diag}(B^\top, 1)G$  lie in the column space of the matrix  $\text{Apx}$ . Let  $T$  be a  $(1 \pm \varepsilon)$   $\ell_1$ -subspace embedding constructed for the matrix  $\text{Apx}$  constructed using (Cohen and Peng, 2015). Therefore

$$\|T \cdot ((\text{Apx} \cdot \text{diag}(B^\top, 1))_{-1}P)_{+1}G - T \cdot \text{Apx} \cdot \text{diag}(B^\top, 1)G\|_{1,1} = (1 \pm \varepsilon) \|((\text{Apx} \cdot \text{diag}(B^\top, 1))_{-1}P)_{+1}G - \text{Apx} \cdot \text{diag}(B^\top, 1)G\|_{1,1}.$$

Again, using the fact that  $\|x^\top G\|_1 = (1 \pm \varepsilon) \|x\|_2$  for all  $d + 1$  dimensional vectors  $x$ , we obtain that

$$\begin{aligned} &\|T \cdot ((\text{Apx} \cdot \text{diag}(B^\top, 1))_{-1}P)_{+1} - T \cdot \text{Apx} \cdot \text{diag}(B^\top, 1)\|_{1,2} \\ &= (1 \pm \varepsilon) \|T \cdot ((\text{Apx} \cdot \text{diag}(B^\top, 1))_{-1}P)_{+1}G - T \cdot \text{Apx} \cdot \text{diag}(B^\top, 1)G\|_{1,1} \\ &= (1 \pm O(\varepsilon)) \|((\text{Apx} \cdot \text{diag}(B^\top, 1))_{-1}P)_{+1}G - \text{Apx} \cdot \text{diag}(B^\top, 1)G\|_{1,1} \\ &= (1 \pm O(\varepsilon)) \|((\text{Apx} \cdot \text{diag}(B^\top, 1))_{-1}P)_{+1} - \text{Apx} \cdot \text{diag}(B^\top, 1)\|_{1,2} \\ &= (1 \pm O(\varepsilon)) \sum_i \text{dist}(A_i, S). \end{aligned}$$

The matrix  $T$  is computed by Lewis Weight Sampling. As the matrix  $\text{Apx}$  has dimensions  $n \times \tilde{O}(k^3/\varepsilon^6)$ , we see from (Cohen and Peng, 2015) that the matrix  $T$  can be computed in time  $n \cdot \text{poly}(k/\varepsilon)$ .  $\square$

**Theorem E.2** (Coreset for  $k$ -median). *There exists a subset  $T \subseteq [n]$  with  $|T| = \tilde{O}(k^4/\varepsilon^8)$  and weights  $w_i$  for  $i \in T$  such that, with probability  $\geq 3/5$ , for any set  $C$  of size  $k$ ,*

$$\sum_{i \in T} w_i \text{dist}(\text{Apx}_{i_*} \cdot \text{diag}(B^T, 1), C_{+1}) = (1 \pm \varepsilon) \sum_{i \in [n]} \text{dist}(A_{i_*}, C).$$

Recall that  $C_{+1} = \{(c, 0) \mid c \in C\}$ .

*Proof.* Let  $S$  denote the rowspan of the matrix  $\text{diag}(B^T, 1)$ . We have  $\dim(S) = \tilde{O}(k^3/\varepsilon^6)$ . Let  $\hat{S}$  be the subspace  $S$  along with an orthogonal dimension. Thus  $\hat{S}$  is an  $\tilde{O}(k^3/\varepsilon^6)$  dimensional subspace of  $\mathbb{R}^{d+1}$ . Let  $C = \{c_1, \dots, c_k\}$  be an arbitrary set of  $k$  centers of  $\mathbb{R}^{d+1}$ . Now it is easy to see that we can find a set of  $k$  points  $\hat{C} = \{\hat{c}_1, \dots, \hat{c}_k\} \subseteq \hat{S}$  such that  $\mathbb{P}_S c_i = \mathbb{P}_S \hat{c}_i$  i.e., the projections of  $c_i$  and  $\hat{c}_i$  onto the subspace  $S$  are the same, and also that  $\text{dist}(c_i, \mathbb{P}_S(c_i)) = \text{dist}(\hat{c}_i, \mathbb{P}_S(\hat{c}_i))$  and therefore, for any point  $a \in S$ ,  $\text{dist}(a, C) = \text{dist}(a, \hat{C})$ .

Now if  $T \subseteq [n]$  and the weights  $w_i$  for  $i \in T$  are such that

$$\sum_{i \in T} w_i \text{dist}(\text{Apx}_{i_*} \cdot \text{diag}(B^T, 1), \tilde{C}) = (1 \pm \varepsilon) \sum_{i=1}^n \text{dist}(\text{Apx}_{i_*} \cdot \text{diag}(B^T, 1), \tilde{C})$$

for all  $k$ -center sets  $\tilde{C} \subseteq \hat{S}$ , then for any  $k$  center set  $C \subseteq \mathbb{R}^{d+1}$ , we have

$$\begin{aligned} \sum_{i \in T} w_i \text{dist}(\text{Apx}_{i_*} \cdot \text{diag}(B^T, 1), C) &= \sum_{i \in T} w_i \text{dist}(\text{Apx}_{i_*} \cdot \text{diag}(B^T, 1), \hat{C}) \\ &= (1 \pm \varepsilon) \sum_{i=1}^n \text{dist}(\text{Apx}_{i_*} \cdot \text{diag}(B^T, 1), \hat{C}) \\ &= (1 \pm \varepsilon) \sum_{i=1}^n \text{dist}(\text{Apx}_{i_*} \cdot \text{diag}(B^T, 1), C). \end{aligned}$$

Thus, preserving the  $k$ -median distances with respect to the  $k$  center sets that lie in  $\hat{S}$ , preserves the  $k$ -median distances to all the center sets in  $\mathbb{R}^{d+1}$ . Using the coreset construction of Feldman and Langberg (2011) on the matrix  $\text{Apx}$ , we can obtain a subset  $T \subseteq [n]$  of size  $\tilde{O}(k^4/\varepsilon^8)$  along with weights  $w_i$  such that for any  $k$ -center set  $C \subseteq \mathbb{R}^{d+1}$ , we have

$$\sum_{i \in T} w_i \text{dist}(\text{Apx}_{i_*} \cdot \text{diag}(B^T, 1), C) = (1 \pm \varepsilon) \sum_{i=1}^n \text{dist}(\text{Apx}_{i_*} \cdot \text{diag}(B^T, 1), C).$$

As  $\text{Apx}$  is an  $n \times \text{poly}(k/\varepsilon)$ -sized matrix, the algorithm of Feldman and Langberg (2011) can be run in time  $n \cdot \text{poly}(k/\varepsilon)$ . Thus, the above subset  $T$  and weights  $w_i$  for  $i \in T$  can be found in time  $n \text{poly}(k/\varepsilon)$ . Now, for any  $k$ -center set  $C \subseteq \mathbb{R}^d$ , we have that

$$\begin{aligned} \sum_{i=1}^n \text{dist}(A_{i_*}, C) &= (1 \pm \varepsilon) \sum_{i=1}^n \sqrt{\text{dist}(B X_{i_*}^T, C) + v_i^2} \\ &= (1 \pm \varepsilon) \sum_{i=1}^n \text{dist}(\text{Apx}_{i_*} \cdot \text{diag}(B^T, 1), C_{+1}) \\ &= (1 \pm \varepsilon) \sum_{i \in T} w_i \text{dist}(\text{Apx}_{i_*} \cdot \text{diag}(B^T, 1), C_{+1}). \end{aligned}$$

Therefore we obtain a coreset of size  $\tilde{O}(k^4/\varepsilon^8)$  in overall time  $\tilde{O}(\text{nnz}(A)/\varepsilon^2 + (n+d)\text{poly}(k/\varepsilon))$ .  $\square$

## F. Near-Linear Time Coreset for $k$ -Median

Let  $A \in \mathbb{R}^{n \times d}$  be the dataset, where each row  $A_{i*}$  of  $A$  denotes a point in  $\mathbb{R}^d$ , for  $i \in [n]$ . We observe that the coreset construction of [Huang and Vishnoi \(2020\)](#) can be implemented in  $\tilde{O}(\text{nnz}(A) + (n + d)\text{poly}(k/\varepsilon))$  time. The authors only need to compute a constant factor approximation and assignment of each point to a center, which gives a constant factor approximation to the optimum. We show that we can compute such an assignment in time  $O(\text{nnz}(A) + (n + d)\text{poly}(k/\varepsilon))$ .

The usual  $k$ -median objective is the following

$$\min_{y_1, \dots, y_k \in \mathbb{R}^d} \sum_{i=1}^n \min_j \|A_i^* - y_j\|_2.$$

We can restrict  $y_j$  to be a row of  $A_i^*$  and lose at most a factor of 2 as follows. Suppose  $y_1^*, \dots, y_k^*$  is the optimal solution. Let  $\mathcal{C}^* = (\mathcal{C}_1^*, \mathcal{C}_2^*, \dots, \mathcal{C}_k^*)$  be the partition of  $[n]$  induced by the optimal solution  $y_1^*, \dots, y_k^*$ , where  $\mathcal{C}_j^*$  denotes all the indices  $i$  such that  $y_j^*$  is the closest center to  $A_{i*}$ . Therefore, the optimal cost for  $k$ -median is

$$\text{OPT} = \sum_{j=1}^k \sum_{i \in \mathcal{C}_j^*} d(A_{i*}, y_j^*).$$

Let  $A_{c(j)}$  be the point closest to  $y_j^*$ , i.e.,

$$\text{for all } i \in \mathcal{C}_j^*, d(A_{i*}, y_j^*) \geq d(A_{c(j)*}, y_j^*).$$

We claim that the  $k$ -median cost of the centers  $A_{c(1)}, \dots, A_{c(k)}$  is at most twice the optimum:

$$\sum_{j=1}^k \sum_{i \in \mathcal{C}_j^*} d(A_{i*}, A_{c(j)*}) \leq \sum_{j=1}^k \left( \sum_{i \in \mathcal{C}_j^*} d(A_{i*}, y_j^*) + d(A_{c(j)*}, y_j^*) \right) \leq \sum_{j=1}^k \sum_{i \in \mathcal{C}_j^*} 2d(A_{i*}, y_j^*) \leq 2\text{OPT}.$$

**Metric  $k$ -median** In this version of  $k$ -median, we restrict to center sets  $C$  that are subsets of the data, i.e., we solve the optimization problem

$$\min_{y_1, \dots, y_k \in A} \sum_{i=1}^n \min_j \|A_i^* - y_j\|_2.$$

Let  $\text{OPT}_{\text{metric}}$  denote the optimum objective value for metric  $k$ -median. From the above, we obtain that

$$\text{OPT}_{\text{metric}} \leq 2\text{OPT}.$$

Therefore, a  $c$ -approximate solution for metric  $k$ -median is at most a  $2c$ -approximate solution for Euclidean  $k$ -median. Let  $\Pi$  be a Johnson Lindenstrauss matrix embedding  $\mathbb{R}^d$  into  $\mathbb{R}^m$ , where  $m = O(\log(n))$ , such that

$$\frac{1}{2}d(A_{i*}, A_{i' *}) \leq d(\Pi A_{i*}, \Pi A_{i' *}) \leq \frac{3}{2}d(A_{i*}, A_{i' *})$$

for all  $i, i' \in [n]$ . Now consider the metric  $k$ -median problem on the points  $\Pi A_{1*}, \dots, \Pi A_{n*}$ . We can obtain an 11-approximate solution to the metric  $k$ -median problem in time  $\tilde{O}(nk + k^7)$  (see Theorem 6.2 of [\(Chen, 2009\)](#)). Let  $A_{c^*(1)*}, \dots, A_{c^*(k)*}$  be the optimal centers for the metric  $k$ -median problem on  $A_{1*}, \dots, A_{n*}$ , and  $\Pi A_{c'(1)}, \dots, \Pi A_{c'(k)}$  be an 11-approximate solution to the metric  $k$ -median on  $\Pi A_{1*}, \dots, \Pi A_{n*}$ . Let  $\mathcal{C}' = (\mathcal{C}'_1, \dots, \mathcal{C}'_k)$  be the partition of  $[n]$  corresponding to this 11-approximate solution. Then the following shows that  $A_{c'(1)}, \dots, A_{c'(k)}$  is a good solution for the



metric  $k$ -median problem on the original dataset:

$$\begin{aligned}
 \sum_{j=1}^k \sum_{i \in \mathcal{C}'_j} d(A_{i*}, A_{c'(j)*}) &\leq 2 \sum_{j=1}^k \sum_{i \in \mathcal{C}'_j} d(\Pi A_{i*}, \Pi A_{c'(j)*}) \\
 &\leq 2 \cdot 11 \sum_{j=1}^k \sum_{i \in \mathcal{C}^*_j} d(\Pi A_{i*}, \Pi A_{c^*(j)*}) \\
 &\leq 2 \cdot 11 \cdot \frac{3}{2} \sum_{j=1}^k \sum_{i \in \mathcal{C}^*_j} d(A_{i*}, A_{c^*(j)*}) \\
 &\leq 33 \text{OPT}_{\text{metric}} \leq 66 \text{OPT}.
 \end{aligned}$$

The time taken to compute  $\Pi A_{1*}, \dots, \Pi A_{n*}$  is  $O(\text{nnz}(A) \log(n))$ , and then we can compute the  $k$  centers and an assignment of points such that this is a 66-approximate solution in time  $\tilde{O}(nk + k^7)$ . Using this assignment, we can implement the first stage of importance sampling in the algorithm of [Huang and Vishnoi \(2020\)](#) in time  $\tilde{O}(\text{nnz}(A) + n \cdot \text{poly}(k/\varepsilon))$ . We note that the first stage of the algorithm of [Huang and Vishnoi \(2020\)](#) only needs a constant factor approximation of the distance of a point to its assigned centers, which can be computed as  $d(\Pi A_{i*}, \Pi A_{c'(j)*})$ , in time  $\tilde{O}(\log(n))$ , if the point  $i$  is assigned to cluster  $j$ . The second stage of their algorithm can be implemented in time  $d \cdot \text{poly}(k/\varepsilon)$ . Thus, we can find a strong coresnet for  $k$ -median in time

$$\tilde{O}(\text{nnz}(A) + (n + d) \cdot \text{poly}(k/\varepsilon)).$$
